# Supplementary material for: Combining predictive and analytical methods to elucidate pharmaceutical biotransformation in activated sludge
Source: Royal Society of Chemistry journal article supplement (doi:10.1039/d3em00161j), 2023-01-01
Supplement: d3em00161j1.pdf [file d3em00161j1.pdf]

## Supplementary Information I (SI-I)

### Combining predictive and analytical methods to elucidate pharmaceutical biotransformation in activated sludge

Leo Trostel<sup>1†</sup> & Claudia Coll<sup>1†</sup>, Kathrin Fenner<sup>1,2,\*</sup>, Jasmin Hafner<sup>1,2</sup>

<sup>1</sup>Department of Environmental Chemistry, Swiss Federal Institute of Aquatic Science and Technology  
(Eawag), 8600 Dübendorf, Zürich, Switzerland

<sup>2</sup>Department of Chemistry, University of Zürich, 8057 Zürich, Switzerland

<sup>†</sup> These authors contributed equally: Leo Trostel, Claudia Coll

\* Corresponding Author: [kathrin.fenner@eawag.ch](mailto:kathrin.fenner@eawag.ch)

Phone: +41 58 765 5085

Fax: +41 58 765 5802

## Contents

|        |                                                                                     |    |
|--------|-------------------------------------------------------------------------------------|----|
| S1.    | Literature Search .....                                                             | 3  |
| S2.    | Prediction of Transformation Products .....                                         | 7  |
| S2.1   | Prediction with EAWAG-PPS .....                                                     | 7  |
|        | access upon request) using the parameters specified in Supplementary Table S2. .... | 7  |
| S2.2   | Prediction with enviPath models .....                                               | 7  |
| S2.3   | Suspect list compilation .....                                                      | 8  |
| S3.    | Biotransformation Experiments .....                                                 | 10 |
| S3.1   | Test compounds .....                                                                | 10 |
| S3.2   | Preparation of test reactors .....                                                  | 18 |
| S3.3   | Sampling .....                                                                      | 19 |
| S3.4   | pH measurements in activated sludge experiments .....                               | 19 |
| S4.    | HPLC-HRMS/MS measurements .....                                                     | 21 |
| S4.1   | HPLC separation.....                                                                | 21 |
| S4.2   | Scan Methods of HRMS .....                                                          | 21 |
| S4.2.1 | Initial suspect screening .....                                                     | 21 |
| S4.2.2 | Stepped Collision energy .....                                                      | 22 |
| S5.    | Compound Discoverer: .....                                                          | 22 |
| S5.1   | Workflow and Parameters: Suspect screening .....                                    | 22 |
| S5.2   | Workflow and Parameters: Expected Compounds .....                                   | 25 |
| S6.    | Precision of Predictions.....                                                       | 29 |
| S6.1   | Precision by Parents.....                                                           | 29 |

## S1. Literature Search

Supplementary Table S1. Detailed overview on results from the literature search. Number of TPs, precision and TP vs Parent ratios were calculated only for the TPs found through suspect screening.

| Authors                                                                                                                                          | Year | Substance class                                | Number of compounds | Initial concentration | Experimental setup                    | Analytical instrument                 | Analytical method                     | Screening type                 | Prediction type | Total predicted TPs | Total number of found TPs | Number of found TPs with suspect screening only | Precision | TP vs parent ratio | Reference                                                                                                         |
|--------------------------------------------------------------------------------------------------------------------------------------------------|------|------------------------------------------------|---------------------|-----------------------|---------------------------------------|---------------------------------------|---------------------------------------|--------------------------------|-----------------|---------------------|---------------------------|-------------------------------------------------|-----------|--------------------|-------------------------------------------------------------------------------------------------------------------|
| Damian E. Helbling, Juliane Hollender, Hans-Peter E. Kohler, Heinz Singer and Kathrin Fenner                                                     | 2010 | pharmaceuticals and pesticides                 | 12                  | 100 µg/L              | batch reactor                         | HPLC-MS Orbitrap                      | dd-MS2 with inclusion list            | target and non-target          | UM-PPS          | 1039                | 26                        | 21                                              | 2.02%     | 2.2                | 10.1021/es100970m                                                                                                 |
| Damian E. Helbling, Juliane Hollender, Hans-Peter E. Kohler and Kathrin Fenner                                                                   | 2010 | general amides, pesticides and pharmaceuticals | 30                  | 100 µg/L              | batch bottle reactor                  | HPLC-MS Orbitrap                      | dd-MS2 with inclusion list            | target and non-target          | UM-PPS          | NA                  | 53                        | NA                                              | NA        | 1.8                | 10.1021/es101035b                                                                                                 |
| Susanne Kern, Rebekka Baumgartner, Damian E. Helbling, Juliane Hollender, Heinz Singer, Martin J. Loos, René P. Schwarzenbach and Kathrin Fenner | 2010 | pharmaceuticals and biocides                   | 8                   | 100 µg/L              | batch reactor                         | HPLC-MS Orbitrap                      | dd-MS2 with inclusion list            | suspect                        | UM-PPS          | two generations     | 12                        | 12                                              | NA        | 1.5                | <a href="https://doi.org/10.1039/C0EM00238K">https://doi.org/10.1039/C0EM00238K</a>                               |
| Carsten Prasse, Manfred Wagner, Ralf Schulz, and Thomas A. Ternes                                                                                | 2011 | pharmaceuticals                                | 2                   | 4 µg/L                | batch bottle reactor                  | HPLC-MS Orbitrap and 1D/2D NMR        | dd-MS2/3 top 2 without inclusion list | suspect and non-target         | UM-PPS          | 56                  | 9                         | 5                                               | 8.93%     | 4.5                | <a href="https://doi.org/10.1021/es103732y">https://doi.org/10.1021/es103732y</a>                                 |
| Elisabeth Müller, Walter Schüssler, Harald Horn, Hilde Lemmer                                                                                    | 2013 | pharmaceuticals                                | 1                   | 10 mg/L               | batch bottle reactor                  | LC-MS Q-Trap hybrid triple-quadrupole | additional GC-MS/MS                   | suspect                        | UM-PPS          | NA                  | 2                         | 2                                               | NA        | 2.0                | <a href="https://doi.org/10.1016/j.chemosphere.2013.02.070">https://doi.org/10.1016/j.chemosphere.2013.02.070</a> |
| Sebastian Huntscha, Thomas B. Hofstetter, Emma L. Schymanski, Stephanie Spahr, and Juliane Hollender                                             | 2014 | benzotriazoles                                 | 3                   | 0.5-2.4 mg/L          | batch bottle reactor                  | UHPLC-MS Orbitrap                     | dd-MS2 with inclusion list            | suspect and non-target         | UM-PPS          | three generations   | 13                        | NA                                              | NA        | 4.3                | <a href="https://doi.org/10.1021/es405694z">https://doi.org/10.1021/es405694z</a>                                 |
| Thomas Letzel, Anne Bayer, Wolfgang Schulz, Alexandra Heermann, Thomas                                                                           | 2015 | pharmaceuticals                                | 5                   | 1-50 µg/L             | batch reactor and waste water samples | RPLC-ESI-QqTOF-MS, RPLC-              | full-scan with MS/MS                  | target, suspect and non-target | EAWAG-BBD/PPS   | 132                 | 6                         | 6                                               | 4.55%     | 1.2                | <a href="https://doi.org/10.1016/j.chemos">https://doi.org/10.1016/j.chemos</a>                                   |

|                                                                                                                                           |      |                                                              |     |                   |                                       |                                                           |                            |                                |                                   |    |     |     |    |        |                                   |                                                                                                                   |
|-------------------------------------------------------------------------------------------------------------------------------------------|------|--------------------------------------------------------------|-----|-------------------|---------------------------------------|-----------------------------------------------------------|----------------------------|--------------------------------|-----------------------------------|----|-----|-----|----|--------|-----------------------------------|-------------------------------------------------------------------------------------------------------------------|
| Lucke, Giorgia Greco, Sylvia Grosse, Walter Schüssler, Manfred Sengl, Marion Letzel                                                       |      |                                                              |     |                   |                                       | HILIC-ESI-TOF-MS, RPLC-ESI-QqQ-MS                         |                            |                                |                                   |    |     |     |    |        | <a href="#">phere.2015.06.083</a> |                                                                                                                   |
| Tina Kosjek, Noelia Negreira, Miren López de Alda, Damià Barceló                                                                          | 2015 | pharmaceuticals                                              | 1   | <b>1 mg/L</b>     | batch bottle reactor                  | UHPLC-MS Orbitrap                                         | dd-MS2 top 5               | suspect and non-target         | UM-PPS                            | NA |     | 9   | 8  | NA     | 9.0                               | <a href="https://doi.org/10.1016/j.chemosphere.2014.04.081">https://doi.org/10.1016/j.chemosphere.2014.04.081</a> |
| Pablo Gago-Ferrero, Emma L. Schymanski, Anna A. Bletsou, Reza Aalizadeh, Juliane Hollender, Nikolaos S. Thomaidis                         | 2015 | pharmaceuticals                                              | 173 | <b>unspiked</b>   | waste water samples                   | UHPLC-QTOF-MS                                             | dd-MS2                     | suspect and non-target         | Metabolite Predict                |    | 284 | 47  | 13 | 4.58%  | 0.3                               | <a href="https://doi.org/10.1021/acs.est.5b03454">https://doi.org/10.1021/acs.est.5b03454</a>                     |
| Rebekka Gulde, Ulf Meier, Emma L. Schymanski, Hans-Peter E. Kohler, Damian E. Helbling, Samuel Derrer, Daniel Rentsch, and Kathrin Fenner | 2016 | pharmaceuticals, pesticides and wastewater-derived chemicals | 19  | <b>120 µg/L</b>   | batch bottle reactor                  | HPLC-MS Orbitrap                                          | dd-MS2 with inclusion list | suspect and non-target         | EAWAG-BBD/PPS, metaprint2 D       |    | 170 | 101 | 33 | 19.41% | 5.3                               | <a href="https://doi.org/10.1021/acs.est.5b05186">https://doi.org/10.1021/acs.est.5b05186</a>                     |
| Vasiliki G. Beretsou, Aikaterini K. Psoma, Pablo Gago-Ferrero, Reza Aalizadeh, Kathrin Fenner, Nikolaos S. Thomaidis                      | 2016 | pharmaceuticals                                              | 1   | <b>2 mg/L</b>     | batch bottle reactor                  | UHPLC-QTOF-MS                                             | dd-MS2 with inclusion list | suspect and non-target         | EAWAG-BBD/PPS, Metabolite Predict | NA |     | 14  | 12 | NA     | 14.0                              | <a href="https://doi.org/10.1016/j.watres.2016.07.029">https://doi.org/10.1016/j.watres.2016.07.029</a>           |
| Thomas Letzel, Sylvia Grosse, Wolfgang Schulz, Thomas Lucke, Angela Kolb, Manfred Sengl, and Marion Letzel                                | 2016 | pharmaceuticals                                              | 1   | <b>10-40 µg/L</b> | batch reactor and waste water samples | RPLC-ESI-QqTOF-MS, RPLC-HILIC-ESI-TOF-MS, RPLC-ESI-QqQ-MS | full-scan with MS/MS       | target, suspect and non-target | EAWAG-BBD/PPS                     |    | 62  | 4   | 3  | 4.84%  | 4.0                               | 10.1021/bk-2016-1241.ch006                                                                                        |
| Tina Kosjek, Noelia Negreira, Ester Heath, Miren López de Alda, Damià Barceló                                                             | 2018 | pharmaceuticals                                              | 1   | <b>1 mg/L</b>     | batch bottle reactor                  | UHPLC-MS Orbitrap                                         | dd-MS2 top 5               | suspect                        | EAWAG-BBD/PPS                     |    | 14  | 11  | 4  | 28.57% | 11.0                              | <a href="http://dx.doi.org/10.1016/j.scitotenv.2017.08.061">http://dx.doi.org/10.1016/j.scitotenv.2017.08.061</a> |
| Stefan Achermann, Per Falås, Adriano Joss, Cresten B. Mansfeldt, Yujie Men, Bernadette                                                    | 2018 | micropollutants                                              | 93  | <b>6 mg/L</b>     | batch reactor                         | HPLC-MS Orbitrap                                          | dd-MS2 with inclusion list | suspect                        | EAWAG-BBD/PPS                     |    | 219 | 75  | 75 | 34.25% | 0.8                               | <a href="https://doi.org/10.1021/acs.est.8b02763">10.1021/acs.est.8b02763</a>                                     |

|                                                                                                                                                  |      |                                |    |                 |                                        |                                    |                                  |                                |                                   |                    |    |    |        |      |                                                                                                         |  |
|--------------------------------------------------------------------------------------------------------------------------------------------------|------|--------------------------------|----|-----------------|----------------------------------------|------------------------------------|----------------------------------|--------------------------------|-----------------------------------|--------------------|----|----|--------|------|---------------------------------------------------------------------------------------------------------|--|
| Vogler, and Kathrin Fenner                                                                                                                       |      |                                |    |                 |                                        |                                    |                                  |                                |                                   |                    |    |    |        |      |                                                                                                         |  |
| Michael T. Zumstein, Damian E. Helbling                                                                                                          | 2019 | pharmaceuticals                | 6  | 100 µg/L        | batch reactor                          | HPLC-MS Orbitrap                   | dd-MS2 with inclusion list       | suspect                        | EAWAG-BBD/PPS                     | 2 or 3 generations | 16 | 16 | NA     | 2.7  | <a href="https://doi.org/10.1016/j.watres.2019.02.024">https://doi.org/10.1016/j.watres.2019.02.024</a> |  |
| Tjasa Gornik, Ana Kovacic, Ester Heath, Juliane Hollender, Tina Kosjek                                                                           | 2020 | pharmaceuticals                | 1  | 1 µg/L - 1 mg/L | batch reactor and pilot WWT bioreactor | HPLC-MS Orbitrap                   | dd-MS2 top 7 with inclusion list | suspect and non-target         | EAWAG-BBD/PPS                     | 3 generations      | 10 | NA | NA     | 10.0 | <a href="https://doi.org/10.1016/j.watres.2020.115864">https://doi.org/10.1016/j.watres.2020.115864</a> |  |
| Rebecca A. Trenholm, Brett J. Vanderford, Narasimman Lakshminarasimman, Drew C. McAvoy and Eric R. V. Dickenson                                  | 2020 | micropollutants                | 3  | 1 mg/L          | batch bottle reactor                   | LC-QTOF-MS                         | no MS2                           | suspect                        | EAWAG-BBD/PPS                     | 40                 | 9  | 9  | 22.50% | 3.0  | 10.1061/(ASCE)EE.1943-7870.0001691                                                                      |  |
| Xuebing Wang, Nanyang Yu, Jingping Yang, Ling Jin, Huiwei Guo, Wei Shi, Xiaowei Zhang, Liuyan Yang, Hongxia Yu, Si Wei                           | 2020 | pesticides and pharmaceuticals | 60 | unspiked        | waste water samples                    | LC-QTOF-MS and LC-quadrupole-MS/MS | dd-MS2 top 20                    | suspect                        | EAWAG-BBD/PPS                     | NA                 | 57 | 21 | NA     | 1.0  | <a href="https://doi.org/10.1016/j.envint.2020.105599">https://doi.org/10.1016/j.envint.2020.105599</a> |  |
| Gang Wu, Jinju Geng, Yufei Shi, Liye Wang, Ke Xu, Hongqiang Ren                                                                                  | 2020 | pharmaceuticals                | 1  | 500 µg/L        | batch bottle reactor                   | LC-QTOF-MS                         | dd-MS2                           | suspect                        | EAWAG-BBD/PPS, Pathpred           | NA                 | 4  | 4  | NA     | 4.0  | <a href="https://doi.org/10.1016/j.watres.2020.116158">https://doi.org/10.1016/j.watres.2020.116158</a> |  |
| Juliet Kinyua, Aikaterini K. Psoma, Nikolaos I. Rousis, Maria-Christina Nika, Adrian Covaci, Alexander L. N. van Nuijs and Nikolaos S. Thomaidis | 2021 | psychoactive substances        | 2  | 2 mg/L          | batch reactor                          | LC-QTOF-MS                         | DIA MS2                          | suspect                        | EAWAG-BBD/PPS, Metabolite Predict | NA                 | 10 | 10 | NA     | 5.0  | 10.3390/metabo11020066                                                                                  |  |
| Wenwen Cai, Pu Ye, Bin Yang, Zhouqi Shi, Qian Xiong, Fangzhou Gao, Yousheng Liu, Jianliang Zhao, Guangguo Ying                                   | 2021 | fungicides                     | 2  | 500 µg/L        | batch bottle reactor                   | HPLC-QTOF-MS                       | dd-MS2 with inclusion list       | suspect and non-target         | EAWAG-BBD/PPS, PathPred           | 36                 | 10 | 3  | 8.33%  | 5.0  | <a href="https://doi.org/10.1016/j.jes.2020.11.007">https://doi.org/10.1016/j.jes.2020.11.007</a>       |  |
| Yeowool Choi, Junho Jeon, Sang Don Kim                                                                                                           | 2021 | triphenyl phosphate            | 1  | 100 µg/L        | waste water samples                    | UHPLC-MS Orbitrap                  | dd-MS2 top 5                     | target, suspect and non-target | EAWAG-BBD/PPS                     | NA                 | 29 | 4  | NA     | 29.0 | <a href="https://doi.org/10.1016/j.watres.2021.117201">https://doi.org/10.1016/j.watres.2021.117201</a> |  |
| A. B. Martínez-Piernas, P. Plaza-Bolaños, A. Agüera                                                                                              | 2021 | pharmaceuticals                | 20 | unspiked        | waste water samples                    | LC-QTOF-MS                         | DIA MS2                          | suspect                        | EAWAG-BBD/PPS                     | 262                | 5  | 5  | 1.91%  | 0.3  | <a href="https://doi.org/10.1016/j.jhazmat.">https://doi.org/10.1016/j.jhazmat.</a>                     |  |

|                                                                                                        |      |                 |    |                   |                                              |                  |                                        |                        |                  |      |    |    |        |     |                                                                                                               |             |
|--------------------------------------------------------------------------------------------------------|------|-----------------|----|-------------------|----------------------------------------------|------------------|----------------------------------------|------------------------|------------------|------|----|----|--------|-----|---------------------------------------------------------------------------------------------------------------|-------------|
|                                                                                                        |      |                 |    |                   |                                              |                  |                                        |                        |                  |      |    |    |        |     |                                                                                                               | 2021.125080 |
| Aikaterini K.Psoma, Nikolaos I. Rousis, Eleni N. Georgantzi, Nikolaos S. Thomaidis                     | 2021 | pharmaceuticals | 4  | <b>0.2-2 mg/L</b> | batch bottle reactor                         | UHPLC-QTOF-MS    | dd-MS2 with inclusion list and DIA MS2 | suspect and non-target | EAWAG-BBD/PPS    | NA   | 22 | NA | NA     | 5.5 | <a href="https://doi.org/10.1016/j.scitotenv.2020.144677">https://doi.org/10.1016/j.scitotenv.2020.144677</a> |             |
| Rebekka Gulde, Moreno Rutsch, Baptiste Clerc, Jennifer E. Schollée, Urs von Gunten, Christa S.McArdell | 2021 | micropollutants | 87 | <b>10 µg/L</b>    | batch bottle reactor and waste water samples | HPLC-MS Orbitrap | dd-MS2 with inclusion list             | suspect and non-target | O3-PPS           | NA   | 84 | NA | NA     | 1.0 | <a href="https://doi.org/10.1016/j.watres.2021.117200">https://doi.org/10.1016/j.watres.2021.117200</a>       |             |
| Yangping Zhang, Haifeng Zhang, Juan Wang, Zhiyong Yu, Hongyan Li, Min Yang                             | 2021 | pesticides      | 30 | <b>unspiked</b>   | waste water and river samples                | LC-QTOF-MS       | DIA MS2                                | suspect and target     | Metabolite pilot | 1400 | 20 | 18 | 1.29%  | 0.7 | <a href="https://doi.org/10.1016/j.scitotenv.2021.147978">https://doi.org/10.1016/j.scitotenv.2021.147978</a> |             |
| Stephanie L. Rich, Michael T. Zumstein, and Damian E. Helbling                                         | 2022 | micropollutants | 40 | <b>100 µg/L</b>   | batch bottle reactor                         | HPLC-MS Orbitrap | dd-MS2 with inclusion list             | suspect                | EAWAG-BBD/PPS    | 227  | 46 | 46 | 20.26% | 1.2 | <a href="https://doi.org/10.1021/acs.est.1c06429">https://doi.org/10.1021/acs.est.1c06429</a>                 |             |

## S2. Prediction of Transformation Products

Transformation products were predicted using EAWAG-PPS and enviPath. The pathway prediction algorithm in enviPath is different from the original algorithm implemented in EAWAG-PPS (Supplementary Figure S1).

### S2.1 Prediction with EAWAG-PPS

EAWAG-PPS was run in Batch mode (<https://test.eawag-bbd.ethz.ch/rxnmulti/> access upon request) using the parameters specified in Supplementary Supplementary Table S.

Supplementary Table S2. Settings used for TP prediction in the EAWAG-PPS/BBD

| Parameter          | Value   |
|--------------------|---------|
| Relative reasoning | True    |
| Immediate rules    | True    |
| Likelihood cutoff  | Neutral |
| Recursion depth    | 3       |

### S2.2 Prediction with enviPath models

The TP predictions with enviPath were performed using a Python script available on GitHub ([https://github.com/FennerLabs/TP\\_predict/blob/main/TP\\_prediction/find\\_best\\_TPs.py](https://github.com/FennerLabs/TP_predict/blob/main/TP_prediction/find_best_TPs.py)). The

following relative reasoning models were used:

- ML-ECC-BBD
- ML-ECC-BBD+SOIL
- ML-ECC-BBD+SLUDGE
- ML-ECC-BBD+SOIL+SLUDGE

The relative reasoning models are publicly available at <https://envipath.org/package/308fc905-f84d-410b-b3ca-ed888d59dd33>.

The predicted pathways were stored for each model separately as a data package on enviPath for visualization:

- Package for results using BBD - ML - ECC - 2022 model:  
<https://envipath.org/package/0915fad3-b889-4aa8-ac98-0707b717be57>
- Package for results using BBD+SOIL - ML - ECC - 2022 model:

<https://envipath.org/package/80cf58b1-21e2-4c28-9cc6-dc69c6445bdf>

- Package for results using BBD+SLUDGE - ML - ECC - 2022 model:

<https://envipath.org/package/7d64aa85-2e3c-413f-a538-4d5f2bfd4662>

- Package for results using BBD+SOIL+SLUDGE - ML - ECC - 2022 model:

<https://envipath.org/package/11f2acd5-5209-4d49-ad77-93f6f6965886>

### **S2.3 Suspect list compilation**

To compile the suspect list from the TP prediction output, the corresponding python script on GitHub was used ([https://github.com/FennerLabs/TP\\_predict/tree/main/File\\_conversion/Prediction\\_output\\_to\\_mass\\_list](https://github.com/FennerLabs/TP_predict/tree/main/File_conversion/Prediction_output_to_mass_list)). The following programming languages and libraries were used: Python version 3.6.13, *RDKit* version 2020.09 (used for mass calculation), *Pandas* version 1.1.5 (used for export as csv files), and *PubChemPy* version 1.0.4 (used for CAS number search).



## A Pathway search with **generation** threshold

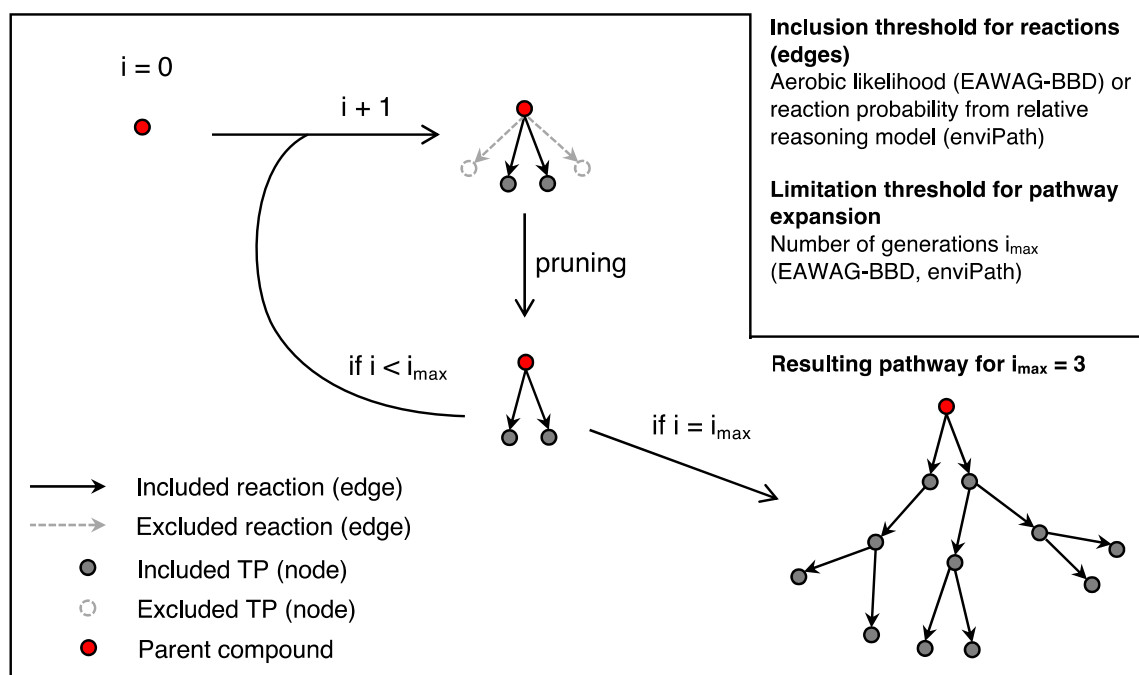

## B Pathway search with **TP number** threshold

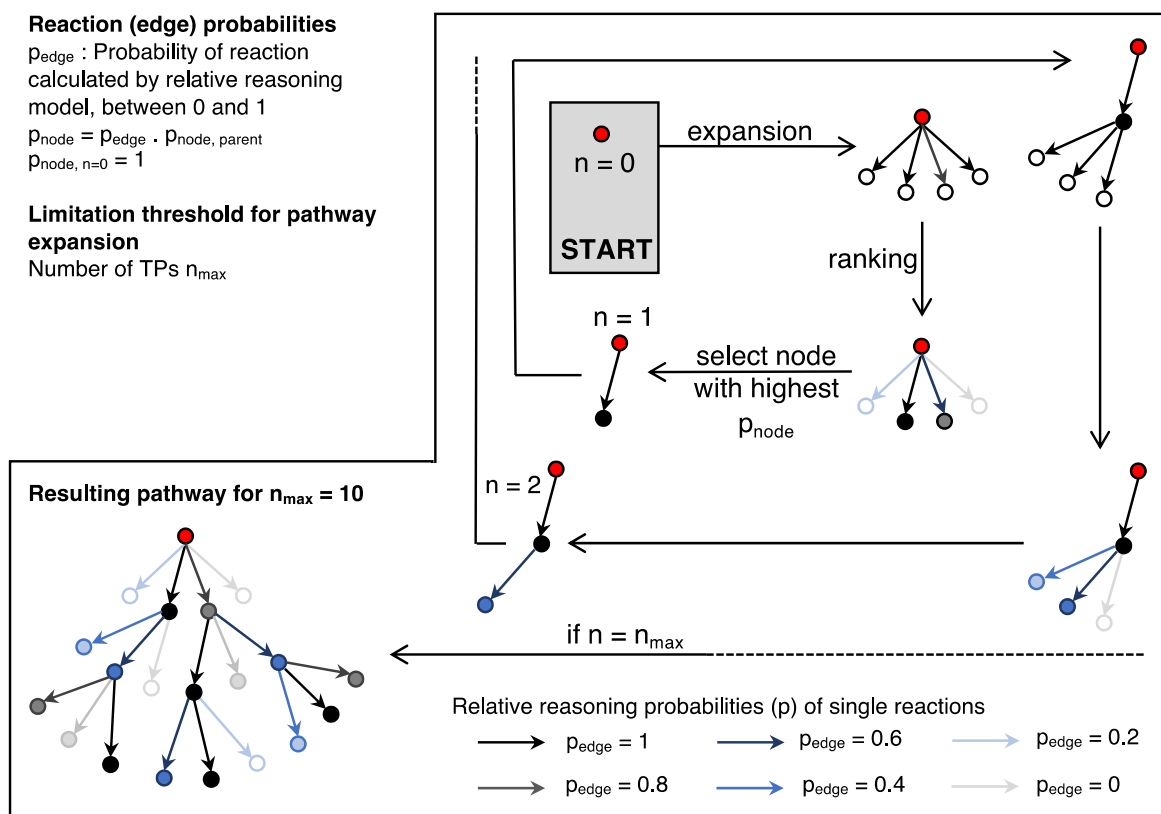

Supplementary Figure S1. Pathway search algorithms used for TP prediction. A In EAWAG-PPS, a breadth-first graph expansion explores predicted nodes one generation after the other. Newly generated nodes are pruned based on the inclusion criterion. When the generation threshold  $i_{\max}$  is reached, the network expansion stops. In enviPath, this type of expansion is available with a relative reasoning threshold probability for node pruning, but not used in this work. B The probabilities assigned to each reaction in enviPath allow for a weight-biased graph traversal, where nodes with high probability are added to the network before nodes with low probability. This type of pathway search yields the top  $k$  TPs with the highest probability to be observed according to the relative reasoning model. The maximum number of TPs to be found is specified as  $n_{\max}$ . In this work, the weight-biased graph expansion is used for the enviPath models.

### S3. Biotransformation Experiments

#### S3.1 Test compounds

Supplementary Table S3. Selected APIs for the biotransformation tests, short name for identification, drug class, main manufacturing company and properties.

| API                                                                                                                                                                                                                                                                                                                                                                                 | Short name | Drug class       | log Koc* | log P** | Charge** |
|-------------------------------------------------------------------------------------------------------------------------------------------------------------------------------------------------------------------------------------------------------------------------------------------------------------------------------------------------------------------------------------|------------|------------------|----------|---------|----------|
| 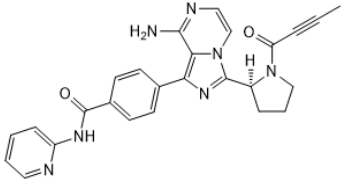 <p>Chemical structure of Acalabrutinib, a BTK inhibitor used in cancer treatment. It features a complex heterocyclic core with a pyridine ring, a benzimidazole ring, and a pyrrolidine ring, along with various substituents including a hydroxyl group, an amino group, and a propyl chain.</p> | Aca        | Antineoplastic   | 4.40     | 2.56    | neutral  |
|  <p>Chemical structure of Aliskiren, an oral renin inhibitor. It consists of a central chain with multiple amide and hydroxyl groups, and a side chain containing a propyl group and a methyl group.</p>                                                                                           | Ali        | Antihypertensive | NA       | 3.12    | cation   |
|  <p>Chemical structure of Amlodipine, a dihydropyridine calcium channel blocker. It features a central dihydropyridine ring with a methyl group, a propyl chain, and a propyl chain with a chlorine atom.</p>                                                                                    | Aml        | Cardiovascular   | 1.57     | 1.64    | cation   |
|  <p>Chemical structure of Atazanavir, a protease inhibitor used in HIV treatment. It features a central chain with multiple amide and hydroxyl groups, and a side chain containing a propyl group and a methyl group.</p>                                                                        | Ata        | Antiretroviral   | 4.51     | 4.54    | neutral  |
|  <p>Chemical structure of Atomoxetine, a norepinephrine reuptake inhibitor. It features a central chain with a methyl group and a propyl chain, and a side chain containing a propyl group and a methyl group.</p>                                                                               | Atm        | Psychostimulant  | 3.56     | 3.81    | cation   |

|                                                                                                          |      |                |      |      |                |
|----------------------------------------------------------------------------------------------------------|------|----------------|------|------|----------------|
| 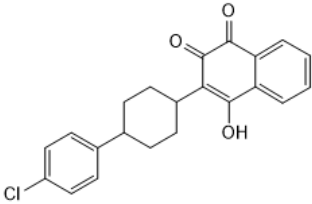 <p>Atovaquone</p>      | Atv  | Antimalarial   | 4.49 | 5.00 | anion          |
|  <p>Budesonide</p>      | Bud  | Corticosteroid | 4.73 | 2.73 | neutral        |
|  <p>Canagliflozin</p>   | Can  | Antidiabetic   | 4.37 | 3.52 | neutral        |
|  <p>Ceritinib</p>      | Ceri | Antineoplastic | 5.39 | 5.81 | cation         |
|  <p>Clopidogrel</p>   | Clp  | Antiplatelet   | 3.17 | 4.03 | neutral        |
|  <p>Clotrimazol</p>   | Clt  | Antifungal     | 3.92 | 5.84 | neutral-cation |
|  <p>Dapagliflozin</p> | Dap  | Antidiabetic   | 2.31 | 2.11 | neutral        |

|                                                                                                                |     |                |      |      |                |
|----------------------------------------------------------------------------------------------------------------|-----|----------------|------|------|----------------|
| 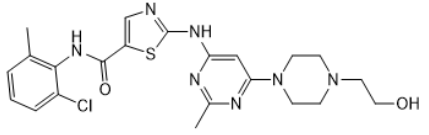 <p><b>Dasatinib</b></p>      | Das | Antineoplastic | 2.99 | 4.01 | neutral-cation |
|  <p><b>Dienogest</b></p>      | Die | Contraceptive  | 5.18 | 2.31 | neutral        |
|  <p><b>Dolutegravir</b></p>   | Dol | Antiviral      | NA   | 1.10 | neutral        |
|  <p><b>Duloxetine</b></p>    | Dul | Antidepressant | 3.47 | 4.20 | cation         |
|  <p><b>Efavirenz</b></p>    | Efa | Antiviral      | 3.17 | 5.15 | neutral        |
|  <p><b>Ezetimibe</b></p>    | Eze | Antilipemic    | 4.92 | 4.56 | neutral        |
|  <p><b>Fexofenadine</b></p> | Fex | Antihistamine  | 5.20 | 2.94 | zwitterion     |

|                                                                                                                     |     |                                     |      |       |                |
|---------------------------------------------------------------------------------------------------------------------|-----|-------------------------------------|------|-------|----------------|
| 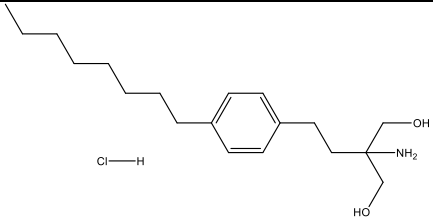 <p><b>Fingolimod</b></p>          | Fin | Multiple Sclerosis Agents           | 3.28 | 4.06  | cation         |
|  <p><b>Hydrochlorothiazide</b></p> | Hyd | Diuretics                           | 1.72 | -0.58 | neutral        |
|  <p><b>Irbesartan</b></p>          | Irb | Angiotensin II Receptor Antagonists | 4.33 | 4.47  | neutral-anion  |
|  <p><b>Keto-desogestrel</b></p>   | Ket | Contraceptive                       | 5.35 | 3.60  | neutral        |
|  <p><b>Lumiracoxib</b></p>       | Lum | Anti-inflammatory                   | 3.14 | 4.31  | anion          |
|  <p><b>Metformin</b></p>         | Met | Antidiabetic                        | 0.98 | -0.92 | cation         |
|  <p><b>Mirtazapine</b></p>       | Mir | Antidepressant                      | 2.81 | 3.21  | neutral-cation |

|                                                                                     |     |                    |      |      |                |
|-------------------------------------------------------------------------------------|-----|--------------------|------|------|----------------|
| 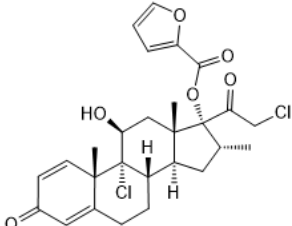   |     |                    |      |      |                |
| Mometasone                                                                          | Mom | Corticosteroid     | 4.96 | 5.06 | neutral        |
|    |     |                    |      |      |                |
| Naloxegol                                                                           | Nal | Opioid Antagonists | 4.94 | 1.36 | neutral-cation |
|   |     |                    |      |      |                |
| Nilotinib                                                                           | Nil | Antineoplastic     | 5.40 | 5.36 | neutral-cation |
|  |     |                    |      |      |                |
| Olanzapine                                                                          | Ola | Antipsychotic      | 2.71 | 3.39 | neutral-cation |
|  |     |                    |      |      |                |
| Omeprazole                                                                          | Ome | Antiulcer          | 2.97 | 2.43 | neutral        |
|  |     |                    |      |      |                |
| Orlistat                                                                            | Orl | Weight Loss        | 4.32 | 8.11 | neutral        |

|                                                                                                               |     |                     |      |       |                |
|---------------------------------------------------------------------------------------------------------------|-----|---------------------|------|-------|----------------|
| 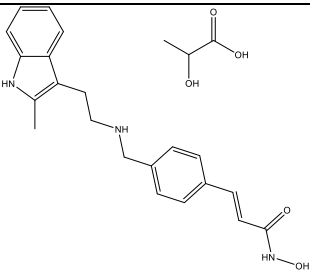 <p><b>Panobinostat</b></p>  | Pan | Antineoplastic      | 1.79 | -3.85 | zwitterion     |
|  <p><b>Pemetrexed</b></p>    | Pem | Antineoplastic      | NA   | 0.43  | anion          |
|  <p><b>Pioglitazone</b></p> | Pio | Hypoglycemic Agents | 4.14 | 3.40  | neutral-anion  |
|  <p><b>Quetiapine</b></p>  | Que | Antipsychotic       | 3.05 | 2.81  | neutral-cation |
|  <p><b>Regorafenib</b></p> | Reg | Antineoplastic      | 5.18 | 4.49  | neutral        |

|                                                                                     |     |                             |      |      |         |
|-------------------------------------------------------------------------------------|-----|-----------------------------|------|------|---------|
| 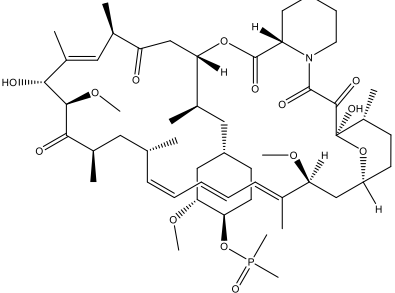   | Rid | Antineoplastic              | NA   | 7.25 | neutral |
|    | Riv | Alzheimer<br>Disease Agents | 2.87 | 2.41 | cation  |
|   | Ros | Antilipemic                 | 1.54 | 1.92 | anion   |
|  | Tad | Erectile<br>Dysfunction     | 4.79 | 1.64 | neutral |
|  | Ter | Antifungal                  | 3.27 | 5.53 | cation  |



|                                                                                                                                                                                                                                                                                                                                                                                      |     |                                     |      |       |         |
|--------------------------------------------------------------------------------------------------------------------------------------------------------------------------------------------------------------------------------------------------------------------------------------------------------------------------------------------------------------------------------------|-----|-------------------------------------|------|-------|---------|
| 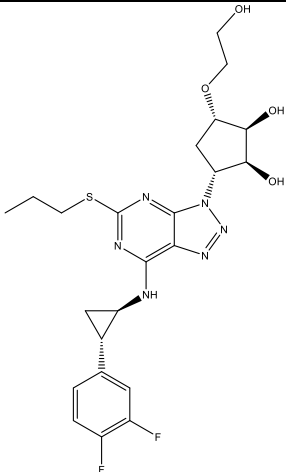 <p>The structure of Ticagrelor features a central triazolopyrimidine ring system. It is substituted with a propylsulfanyl group, a cyclopropylamino group, and a 2,4-difluorophenyl group. A chiral center is present, with a hydroxyl group and a 2-hydroxypropyl group attached to the ring.</p> | Tic | Antithrombotic                      | 3.23 | 2.28  | neutral |
|  <p>The structure of Valsartan consists of a central valeryl-L-valine moiety. The valine part is substituted with a 4-(1H-tetrazol-5-yl)phenyl group and a 2-phenylphenyl group.</p>                                                                                                                | Val | Angiotensin II Receptor Antagonists | 2.77 | 5.27  | cation  |
|  <p>The structure of Vildagliptin features a bicyclic bicyclo[2.2.1]heptane core with a hydroxyl group. It is linked via a methylene group to a secondary amine, which is further connected to a carbonyl group and a 2-cyanoethyl group.</p>                                                      | Vil | Antidiabetic                        | 2.96 | -0.22 | cation  |
|  <p>The structure of Vorinostat is a long-chain fatty acid derivative. It consists of a phenyl ring attached to an amide group, followed by a long aliphatic chain ending in a hydroxamic acid group (-CONHOH).</p>                                                                               | Vor | Antineoplastic                      | 3.09 | 2.00  | anion   |

\* Obtained from OPERA v2.7 (<https://github.com/kmansouri/OPERA>), \*\*Values calculated with ChemAxon software ([www.chemicalize.com](http://www.chemicalize.com)) for pH 7

The spike mixture containing all APIs (20 mL, 10 mg/L ( $\pm$  8%) for each parent, in EtOH) was prepared gravimetrically by adding each stock solution (about 160 mg each, 1 g/L in MeOH or EtOH) of the respective substance.

### S3.2 Preparation of test reactors

Activated sludge (4 L, total suspended solids (TSS) 2.8 g/L, and 1.27 mg/L dissolved O<sub>2</sub> at 15.4 °C at the time of collection) was collected from the ARA-Neugut (Dübendorf, Switzerland) and immediately transported to Eawag laboratories. The activated sludge (3 x 700 mL) was centrifuged for 1 min at 2'000 rpm and afterwards the supernatant (3 x 400 mL) was separated. The remaining volume (3 x 300 mL) was used for the incubations with high biomass (HB, TSS 7.1 g/L). The supernatant (600 mL) was then poured to native sludge (150 mL, not centrifuged) to prepare the incubations with dilute biomass (DB, TSS 0.6 g/L). Sludge suspensions (6 x 50 mL for HB and DB) were added to 100 mL biotransformation (BT) bottles and unspiked control (UC) reactors. The remaining supernatant (200 mL) was filtered with 0.2  $\mu$ m filter paper and the filtrate (2 x 50 mL) was added to 100 mL abiotic control (AB) bottles. DB and HB suspensions (2 x 50 mL each) were further added to 100 mL sorption control (SC) bottles. AB bottles were once autoclaved (121 °C and 103 kPa for 20 min), whereas SC bottles were autoclaved twice. All bottle incubations were stirred and air (0.5 bar) was bubbled through. Additionally, CO<sub>2</sub> (1 bar) was bubbled through half of the reactors. All reactors were equilibrated for 1 h prior to incubating with the API mixtures.

Supplementary Table S4. Experimental setup and number of biotransformation and control reactors (HB = high biomass with TSS = 7.1 g/L, DB = dilute biomass with TSS = 0.6 g/L, native sludge with TSS = 2.8 g/L).

| Treatment      | Biotransformation |    | Abiotic control | Sorption control |    | Unspiked control |    |
|----------------|-------------------|----|-----------------|------------------|----|------------------|----|
|                | HB                | DB |                 | HB               | DB | HB               | DB |
| <b>pH-low</b>  | 2                 | 2  | 1               | 1                | 1  | 1                | 1  |
| <b>pH-high</b> | 2                 | 2  | 1               | 1                | 1  | 1                | 1  |

The addition of APIs was performed as follows: the spike mixture containing all the APIs (40  $\mu$ L, 10 mg/L) was added to 16 empty 100 mL amber glass bottle. The solvent was allowed to evaporate over 15 min and then the contents from the equilibrated sludge bottles was transferred to the spiked

amber bottles. The resulting final concentration was thus 8 µg/L for each parent compound. The remaining four UC reactors were not incubated with APIs.

### S3.3 Sampling

Samples were collected at time points 0 h, 2h, 4 h, 9 h, 24 h, 30 h, 48 h, 54 h and 72 h. Aliquot (1.5 mL) was transferred to 2 mL *Eppendorf* tubes and centrifuged for 10 min at 15'000 rpm. Supernatant (0.8 mL) was added to a 1.5 mL muffled amber vial (500 °C in 2 h, hold for 4.5 h) and stored at 4 °C until 72 h after first sampling. Samples were stored at -20 °C after the experiment. Triplicates were sampled for 0 h from all reactors and 30 h for BT reactors. Weight of reactors were determined before, after taking aliquots, and at the start and end of the day to calculate evaporation losses. Nanopure water was added to compensate for losses.

### S3.4 pH measurements in activated sludge experiments

The pH was monitored by measuring it twice a day (*pH Meter 913; Metrohm, Herisau, Switzerland*).

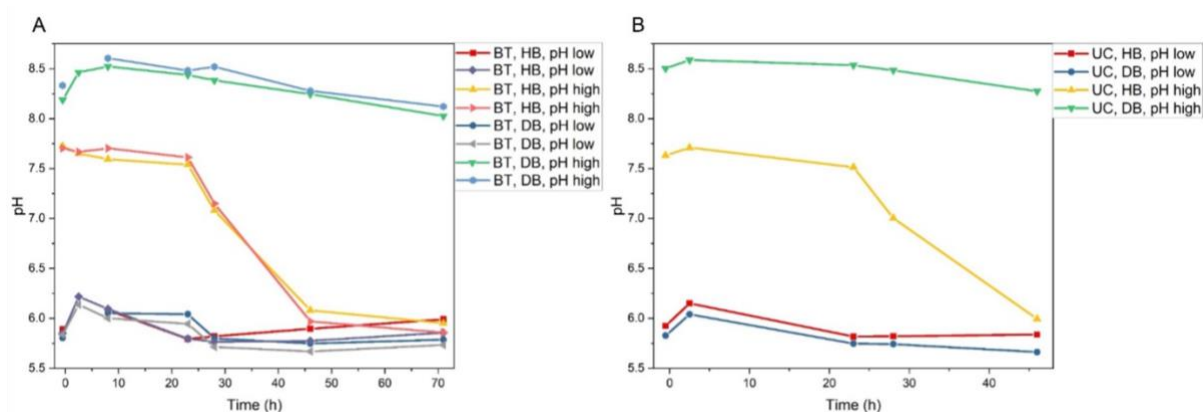

Supplementary Figure S2. Monitoring of pH in biotransformation (BT) reactors with high biomass (HB) or diluted biomass (DB) over the course of the experiment (A) and unspiked control (UC) reactors (B).

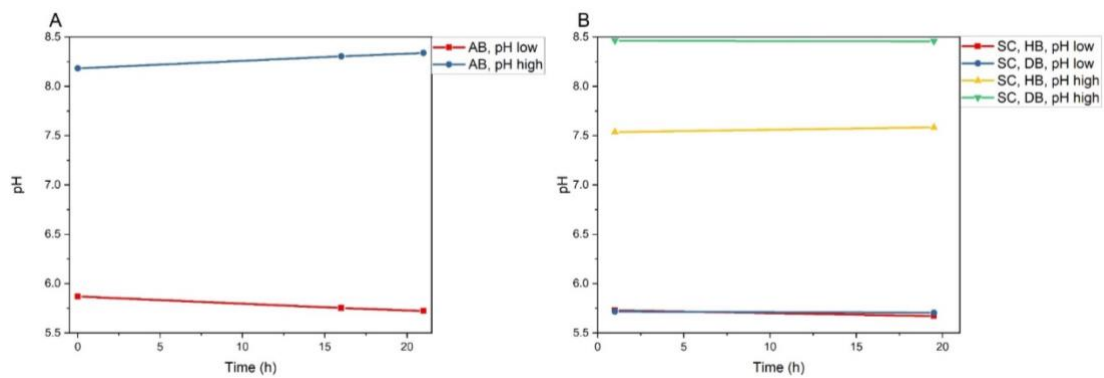

Supplementary Figure S3. Monitoring of pH in abiotic (AB) and sorption control (SC) reactors, (A) and (B), respectively, over the first 20 hours of the experiment .

## **S4. HPLC-HRMS/MS measurements**

### **S4.1 HPLC separation**

HPLC-grade (nanopure) water was collected from *Arium pro DI Ultrapure Water System* (*Satorius*, Gottingen, Germany). Samples of 100  $\mu\text{L}$  on-flow with an auto-sampler (mobile phase:  $\text{H}_2\text{O}/\text{MeOH} + 0.1\% \text{HCOOH}$  following flow gradient; flow rate  $300 \mu\text{L min}^{-1}$ , MeOH purchased from Fisher Scientific) were injected into HPLC column (*Atlantis T3* with *VanGuard* pre-column,  $3.0 \times 150$  mm, C18, particle size:  $3 \mu\text{m}$ ). For the liquid chromatography, initial conditions for the mobile phase composition were set at 95:5 water/methanol and were maintained at this condition for 1 min. Then, the methanol fraction was increased to 5:95 water/methanol over 16 min and held at this composition for 8 min. Initial conditions were reestablished after 0.1 min and maintained for 4.9 min before starting the next analysis.

### **S4.2 Scan Methods of HRMS**

HPLC was coupled to an electrospray ionization high-resolution mass spectrometer QExactive Plus (*Thermo Fisher Scientific*, Bremen, Germany). Ion source parameters: spray voltage 3.5 kV, capillary temperature  $320^\circ\text{C}$ , sheath gas  $32 \text{ L min}^{-1}$ , s-lens RF level 50.0; full scan MS with data-dependent  $\text{MS}^2$ ; mass calibration  $<0.5$  ppm accuracy in (+/-)-ESI with in-house calibration solution.

#### **S4.2.1 Initial suspect screening**

Samples (all timepoints, all treatments and controls) were measured twice (once in positive and once in negative ionizations) first acquiring MS in full scan mode at a resolution of 140,000, scan range of 100 to 1000 m/z. Then data-dependent  $\text{MS}^2$  spectra were acquired at a resolution of 17,500, maximum ion time of 50 ms, isolation window 1 m/z, dynamic exclusion of 8 s and default NCE of 30 (to be used in any intense ion that is not in the inclusion list). The inclusion list (Section S2.3, Suspect list compilation) contained the calculated mass of  $[\text{M}+\text{H}]^+$  or  $[\text{M}-\text{H}]^-$  ion based on molecular formula of the parents and predicted TPs and a corresponding NCE calculated with Eq 1.

### S4.2.2 Stepped Collision energy

Samples (biotransformation bottles at 4 timepoints: 0h, 2h, 24h and 72h) were re-measured once first acquiring MS in full scan in positive mode at a resolution of 70,000, scan range of 100 to 1000 m/z. Then data-dependent MS<sup>2</sup> spectra were acquired at a resolution of 17,500, maximum ion time of 100 ms, isolation window 1 m/z, dynamic exclusion of 6 s and stepped NCE of 15, 35 and 60. The inclusion list contained the calculated mass of [M+H]<sup>+</sup> or [M-H]<sup>-</sup> ion based on molecular formula of selected predicted TPs where more fragmentation could help in improving structural identification.

## S5. Compound Discoverer:

Version 3.2.0.421

### S5.1 Workflow and Parameters: Suspect screening

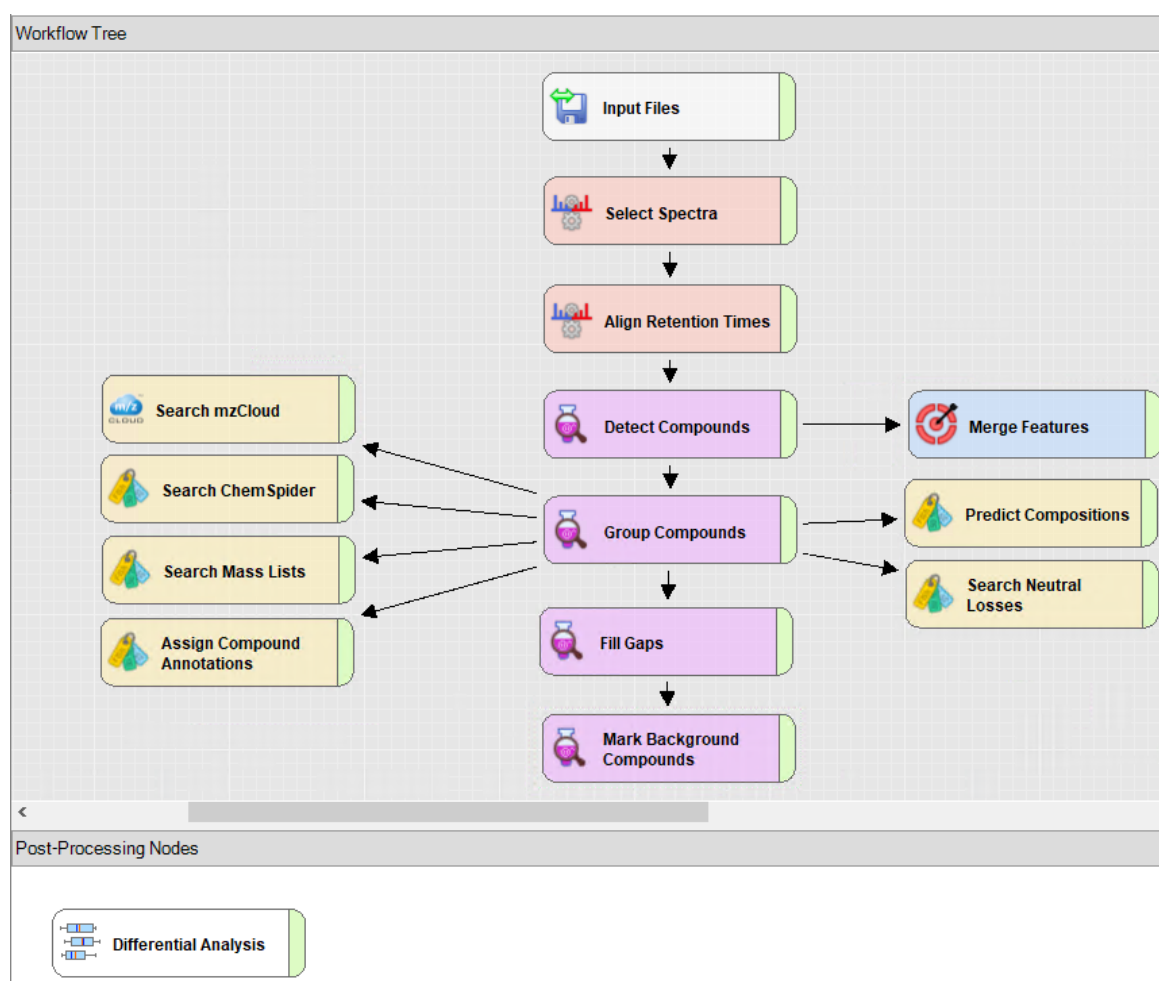

Supplementary Figure S4. Compound Discoverer workflow for the automatic detection of transformation products.

Supplementary Table S5. Parameters used for the used Compound Discoverer workflow.

| <b>Compound discoverer nodes</b>      |                                                                                             |
|---------------------------------------|---------------------------------------------------------------------------------------------|
| <b>Select Spectra Node</b>            |                                                                                             |
| Lower RT Limit [min]                  | 2.9                                                                                         |
| Upper RT Limit [min]                  | 28                                                                                          |
| Polarity Mode                         | Any                                                                                         |
| <b>Align Retention Times Node</b>     |                                                                                             |
| Alignment Model                       | Adaptive Curve                                                                              |
| Maximum shift [min]                   | 2                                                                                           |
| Mass Tolerance                        | 5 ppm                                                                                       |
| <b>Detect Compounds Node</b>          |                                                                                             |
| Mass Tolerance                        | 5 ppm                                                                                       |
| Intensity Tolerance [%]               | 30                                                                                          |
| S/N Threshold                         | 3                                                                                           |
| Min. Peak Intensity                   | 500000                                                                                      |
| Ions                                  | [M+H] <sup>+</sup> +1; [M+K] <sup>+</sup> +1; [M+Na] <sup>+</sup> +1; [M-H] <sup>-</sup> -1 |
| Min. Element Counts                   | C H                                                                                         |
| Max. Element Counts                   | C60 H100 Br2 Cl5 F10 N10 O20 P5 S5                                                          |
| <b>Merge Features Node</b>            |                                                                                             |
| Mass Tolerance                        | 5 ppm                                                                                       |
| RT Tolerance [min]                    | 1                                                                                           |
| <b>Group Compounds Node</b>           |                                                                                             |
| Mass Tolerance                        | 5 ppm                                                                                       |
| RT Tolerance [min]                    | 0.2                                                                                         |
| Preferred Ions                        | [M+H] <sup>+</sup> +1; [M-H] <sup>-</sup> -1                                                |
| <b>Fill Gaps Node</b>                 |                                                                                             |
| Mass Tolerance                        | 5 ppm                                                                                       |
| S/N Threshold                         | 1.5                                                                                         |
| <b>Mark Background Compounds Node</b> |                                                                                             |
| Max. Sample/Blank                     | 5                                                                                           |
| Max. Blank/Sample                     | 0                                                                                           |
| Hide Background                       | True                                                                                        |
| <b>Search mzCloud Node</b>            |                                                                                             |
| Compound Classes                      | All                                                                                         |
| Library                               | Autoprocessed; Reference                                                                    |
| DDA Search                            |                                                                                             |
| Identity Search                       | HighChem HighRes                                                                            |
| Match Activation Type                 | True                                                                                        |
| Match Activation Energy               | Match with Tolerance                                                                        |
| Activation Energy Tolerance           | 20                                                                                          |
| Apply Intensity Threshold             | True                                                                                        |
| Similarity Search                     | None                                                                                        |
| Match Factor Threshold                | 60                                                                                          |
| DIA Search                            |                                                                                             |
| Use DIA Scans for Search              | False                                                                                       |

|                                         |                                                                                                                    |
|-----------------------------------------|--------------------------------------------------------------------------------------------------------------------|
| Max. Isolation Width [Da]               | 500                                                                                                                |
| Match Activation Type                   | False                                                                                                              |
| Match Activation Energy                 | 100                                                                                                                |
| Apply Intensity Threshold               | False                                                                                                              |
| Match Factor Threshold                  | 20                                                                                                                 |
| <b>Search ChemSpider Node</b>           |                                                                                                                    |
| Database(s)                             | KEGG                                                                                                               |
| Search Mode                             | By Formula or Mass                                                                                                 |
| Mass Tolerance                          | 5 ppm                                                                                                              |
| Max. # of results per compound          | 20                                                                                                                 |
| Max. # of Predicted Compounds           | 3                                                                                                                  |
| <b>Predict Compositions Node</b>        |                                                                                                                    |
| Mass Tolerance                          | 5 ppm                                                                                                              |
| Min. Element Counts                     | C H                                                                                                                |
| Max. Element Counts                     | C60 H100 Br2 Cl5 F10 N10 O20 P5 S5                                                                                 |
| Min. RDBE                               | 0                                                                                                                  |
| Max. RDBE                               | 40                                                                                                                 |
| Min. H/C                                | 0.1                                                                                                                |
| Max. H/C                                | 3.5                                                                                                                |
| Max. # Candidates                       | 10                                                                                                                 |
| Intensity Tolerance [%]                 | 30                                                                                                                 |
| Intensity Threshold [%]                 | 0.1                                                                                                                |
| S/N Threshold                           | 3                                                                                                                  |
| Use Dynamic Recalibration               | True                                                                                                               |
| Use Fragments Matching                  | True                                                                                                               |
| <b>Assign Compound Annotations Node</b> |                                                                                                                    |
| Mass Tolerance                          | 5 ppm                                                                                                              |
| Data Source #1                          | MassList Search                                                                                                    |
| Data Source #2                          | Predicted Composition                                                                                              |
| Data Source #3                          | mzCloud Search                                                                                                     |
| Data Source #4                          | ChemSpider Search                                                                                                  |
| Use mzLogic                             | True                                                                                                               |
| Use Spectral Distance                   | True                                                                                                               |
| Sfit Threshold                          | 20                                                                                                                 |
| Sfit Range                              | 20                                                                                                                 |
| <b>Search Mass Lists Node</b>           |                                                                                                                    |
| Mass Lists                              | Import from csv                                                                                                    |
| Use Retention Time                      | True                                                                                                               |
| RT Tolerance [min]                      | 2                                                                                                                  |
| Mass Tolerance                          | 5 ppm                                                                                                              |
| <b>Search Neutral Losses Node</b>       |                                                                                                                    |
| High Acc. Mass Tolerance                | 2.5 mmu                                                                                                            |
| Low Acc. Mass Tolerance                 | 0.5 Da                                                                                                             |
| Neutral Losses                          | Br, C2 H3, C2 H3 O2, C2 H4 N, C2 H5, C2 H5 O, C2 H6 O, C2 H6, C3 H7, C4 H10, C4 H7, C4 H8, C4 H9, C H2, C2 H2 O, C |



|                              |                                                                                                                                                                                                                                                                                                                                     |
|------------------------------|-------------------------------------------------------------------------------------------------------------------------------------------------------------------------------------------------------------------------------------------------------------------------------------------------------------------------------------|
|                              | H3, C3 H6, C2 H3 O, C2 H4 O2, C H3 O, C H4 O, C H4, C H5 O, Cl, C O, C O2, C O3, C H2 N O, C6 H10 O4, F, C6 H10 O7, C6 H8 O6, H, H2, C2 H4, C H2 O, H2 O, H2 S, H Br, C2 H2, H Cl, C H N, C6 H10 O5, C12 H20 O10, H F, H I, H S, I, H3 N, N O, N O2, H O, C5 H8 O4, C11 H18 O9, C10 H16 O8, C5 H7 N O3, S, O S, O2 S, C10 H15 N3 O6 |
| S/N Threshold                | 3                                                                                                                                                                                                                                                                                                                                   |
| Use DIA Scans for Search     | FALSE                                                                                                                                                                                                                                                                                                                               |
| <b>Differential Analysis</b> |                                                                                                                                                                                                                                                                                                                                     |
| Log10 Transform Values       | TRUE                                                                                                                                                                                                                                                                                                                                |

Supplementary Table S6. Parameters that were used for the built-in in silico fragmentation tool (FISh Score).

| Parameter                    | Settings |
|------------------------------|----------|
| Annotate full spectrum tree  | True     |
| Use general rules            | True     |
| Use fragmentation libraries  | True     |
| Allow aromatic cleavage      | True     |
| Max. Depth                   | 5        |
| High accuracy mass tolerance | 2.5 mmu  |
| Low accuracy mass tolerance  | 0.5 Da   |
| S/N threshold                | 3        |

## S5.2 Workflow and Parameters: Expected Compounds

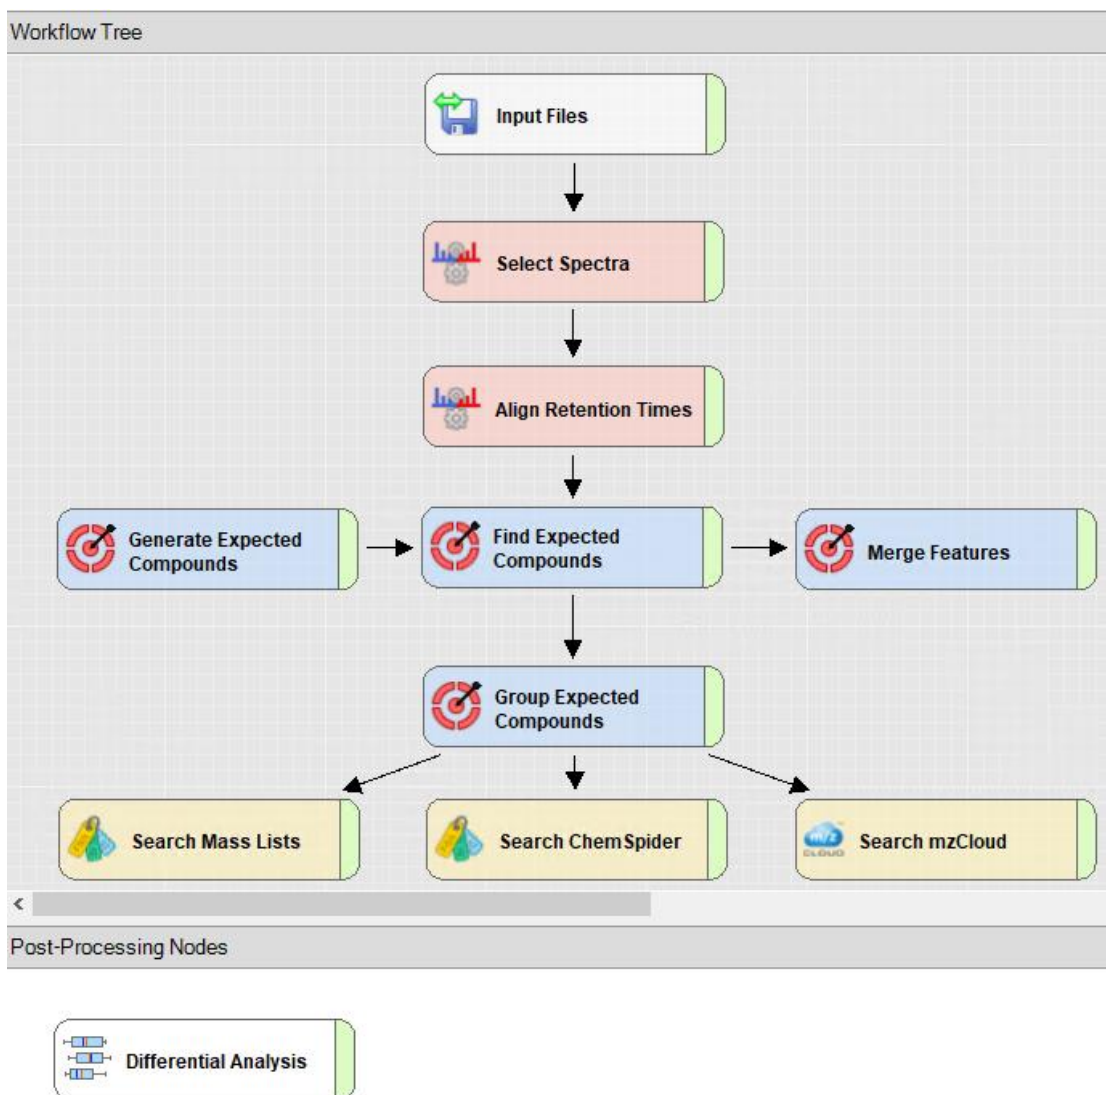

Supplementary Figure S5. Compound Discoverer workflow for the prediction of TPs resulting from conjugation reactions and their detection.

Supplementary Table S7. Used parameters for the Compound Discoverer workflow for the prediction of TPs resulting from conjugation reactions and their detection.

| Compound discoverer nodes               |                                   |
|-----------------------------------------|-----------------------------------|
| <b>Select Spectra Node</b>              |                                   |
| Lower RT Limit [min]                    | 2.9                               |
| Upper RT Limit [min]                    | 28                                |
| Polarity Mode                           | Any                               |
| <b>Generate Expected Compounds Node</b> |                                   |
| Compounds                               | All parent imported as .sdf files |
| Dealkylation                            |                                   |
| Apply Dealkylation                      | FALSE                             |
| Apply Dearylation                       | FALSE                             |
| Max. # of Steps                         | 1                                 |
| Min. Mass [Da]                          | 100                               |

|                                      |                                                                                     |
|--------------------------------------|-------------------------------------------------------------------------------------|
| Transformation                       |                                                                                     |
| Max. # of Steps                      | 2                                                                                   |
| Max. # Phase II                      | 1                                                                                   |
| Others                               |                                                                                     |
| Phase I                              |                                                                                     |
| Phase II                             | Acetylation, Formylation, Fumarylation, Malonylation, Succinylation                 |
| Ions                                 | M+H, M+H-H <sub>2</sub> O, M+K, M+Na, M+NH <sub>4</sub> , M-H, M-H-H <sub>2</sub> O |
| <b>Find Expected Compounds Node</b>  |                                                                                     |
| Avg Peak width [min]                 | 0                                                                                   |
| Intensity Threshold [%]              | 0.1                                                                                 |
| Intensity Tolerance [%]              | 30                                                                                  |
| Mass Tolerance                       | 5 ppm                                                                               |
| Min. # Isotopes                      | 2                                                                                   |
| Min. Peak Intensity                  | 500000                                                                              |
| S/N Threshold                        | 3                                                                                   |
| <b>Group Expected Compounds Node</b> |                                                                                     |
| RT Tolerance [min]                   | 0.2                                                                                 |
| Preferred Ions                       | M+H, M-H                                                                            |
| <b>Align Retention Times Node</b>    |                                                                                     |
| Alignment Model                      | Adaptive Curve                                                                      |
| Maximum shift [min]                  | 2                                                                                   |
| Mass Tolerance                       | 5 ppm                                                                               |
| <b>Merge Features Node</b>           |                                                                                     |
| Mass Tolerance                       | 5 ppm                                                                               |
| RT Tolerance [min]                   | 1                                                                                   |
| <b>Group Compounds Node</b>          |                                                                                     |
| Mass Tolerance                       | 5 ppm                                                                               |
| RT Tolerance [min]                   | 0.2                                                                                 |
| Preferred Ions                       | [M+H] <sup>+</sup> +1; [M-H] <sup>-</sup> -1                                        |
| <b>Search mzCloud Node</b>           |                                                                                     |
| Compound Classes                     | All                                                                                 |
| Library                              | Autoprocessed; Reference                                                            |
| DDA Search                           |                                                                                     |
| Identity Search                      | HighChem HighRes                                                                    |
| Match Activation Type                | True                                                                                |
| Match Activation Energy              | Match with Tolerance                                                                |
| Activation Energy Tolerance          | 20                                                                                  |
| Apply Intensity Threshold            | True                                                                                |
| Similarity Search                    | None                                                                                |
| Match Factor Threshold               | 60                                                                                  |
| DIA Search                           |                                                                                     |
| Use DIA Scans for Search             | False                                                                               |
| Max. Isolation Width [Da]            | 500                                                                                 |
| Match Activation Type                | False                                                                               |

|                                |                    |
|--------------------------------|--------------------|
| Match Activation Energy        | 100                |
| Apply Intensity Threshold      | False              |
| Match Factor Threshold         | 20                 |
| <b>Search ChemSpide Node</b>   |                    |
| Database(s)                    | KEGG               |
| Search Mode                    | By Formula or Mass |
| Mass Tolerance                 | 5 ppm              |
| Max. # of results per compound | 20                 |
| Max. # of Predicted Compounds  | 3                  |
| <b>Search Mass Lists Node</b>  |                    |
| Mass Lists                     | Import from csv    |
| Use Retention Time             | True               |
| RT Tolerance [min]             | 2                  |
| Mass Tolerance                 | 5 ppm              |
| <b>Differential Analysis</b>   |                    |
| Log10 Transform Values         | TRUE               |
